# Supplementary material
Source: Springer Nature journal article supplement (https://www.springermedizin.de/resource/supplementary/13613_2012_102_MOESM1_ESM.pdf/12196106)

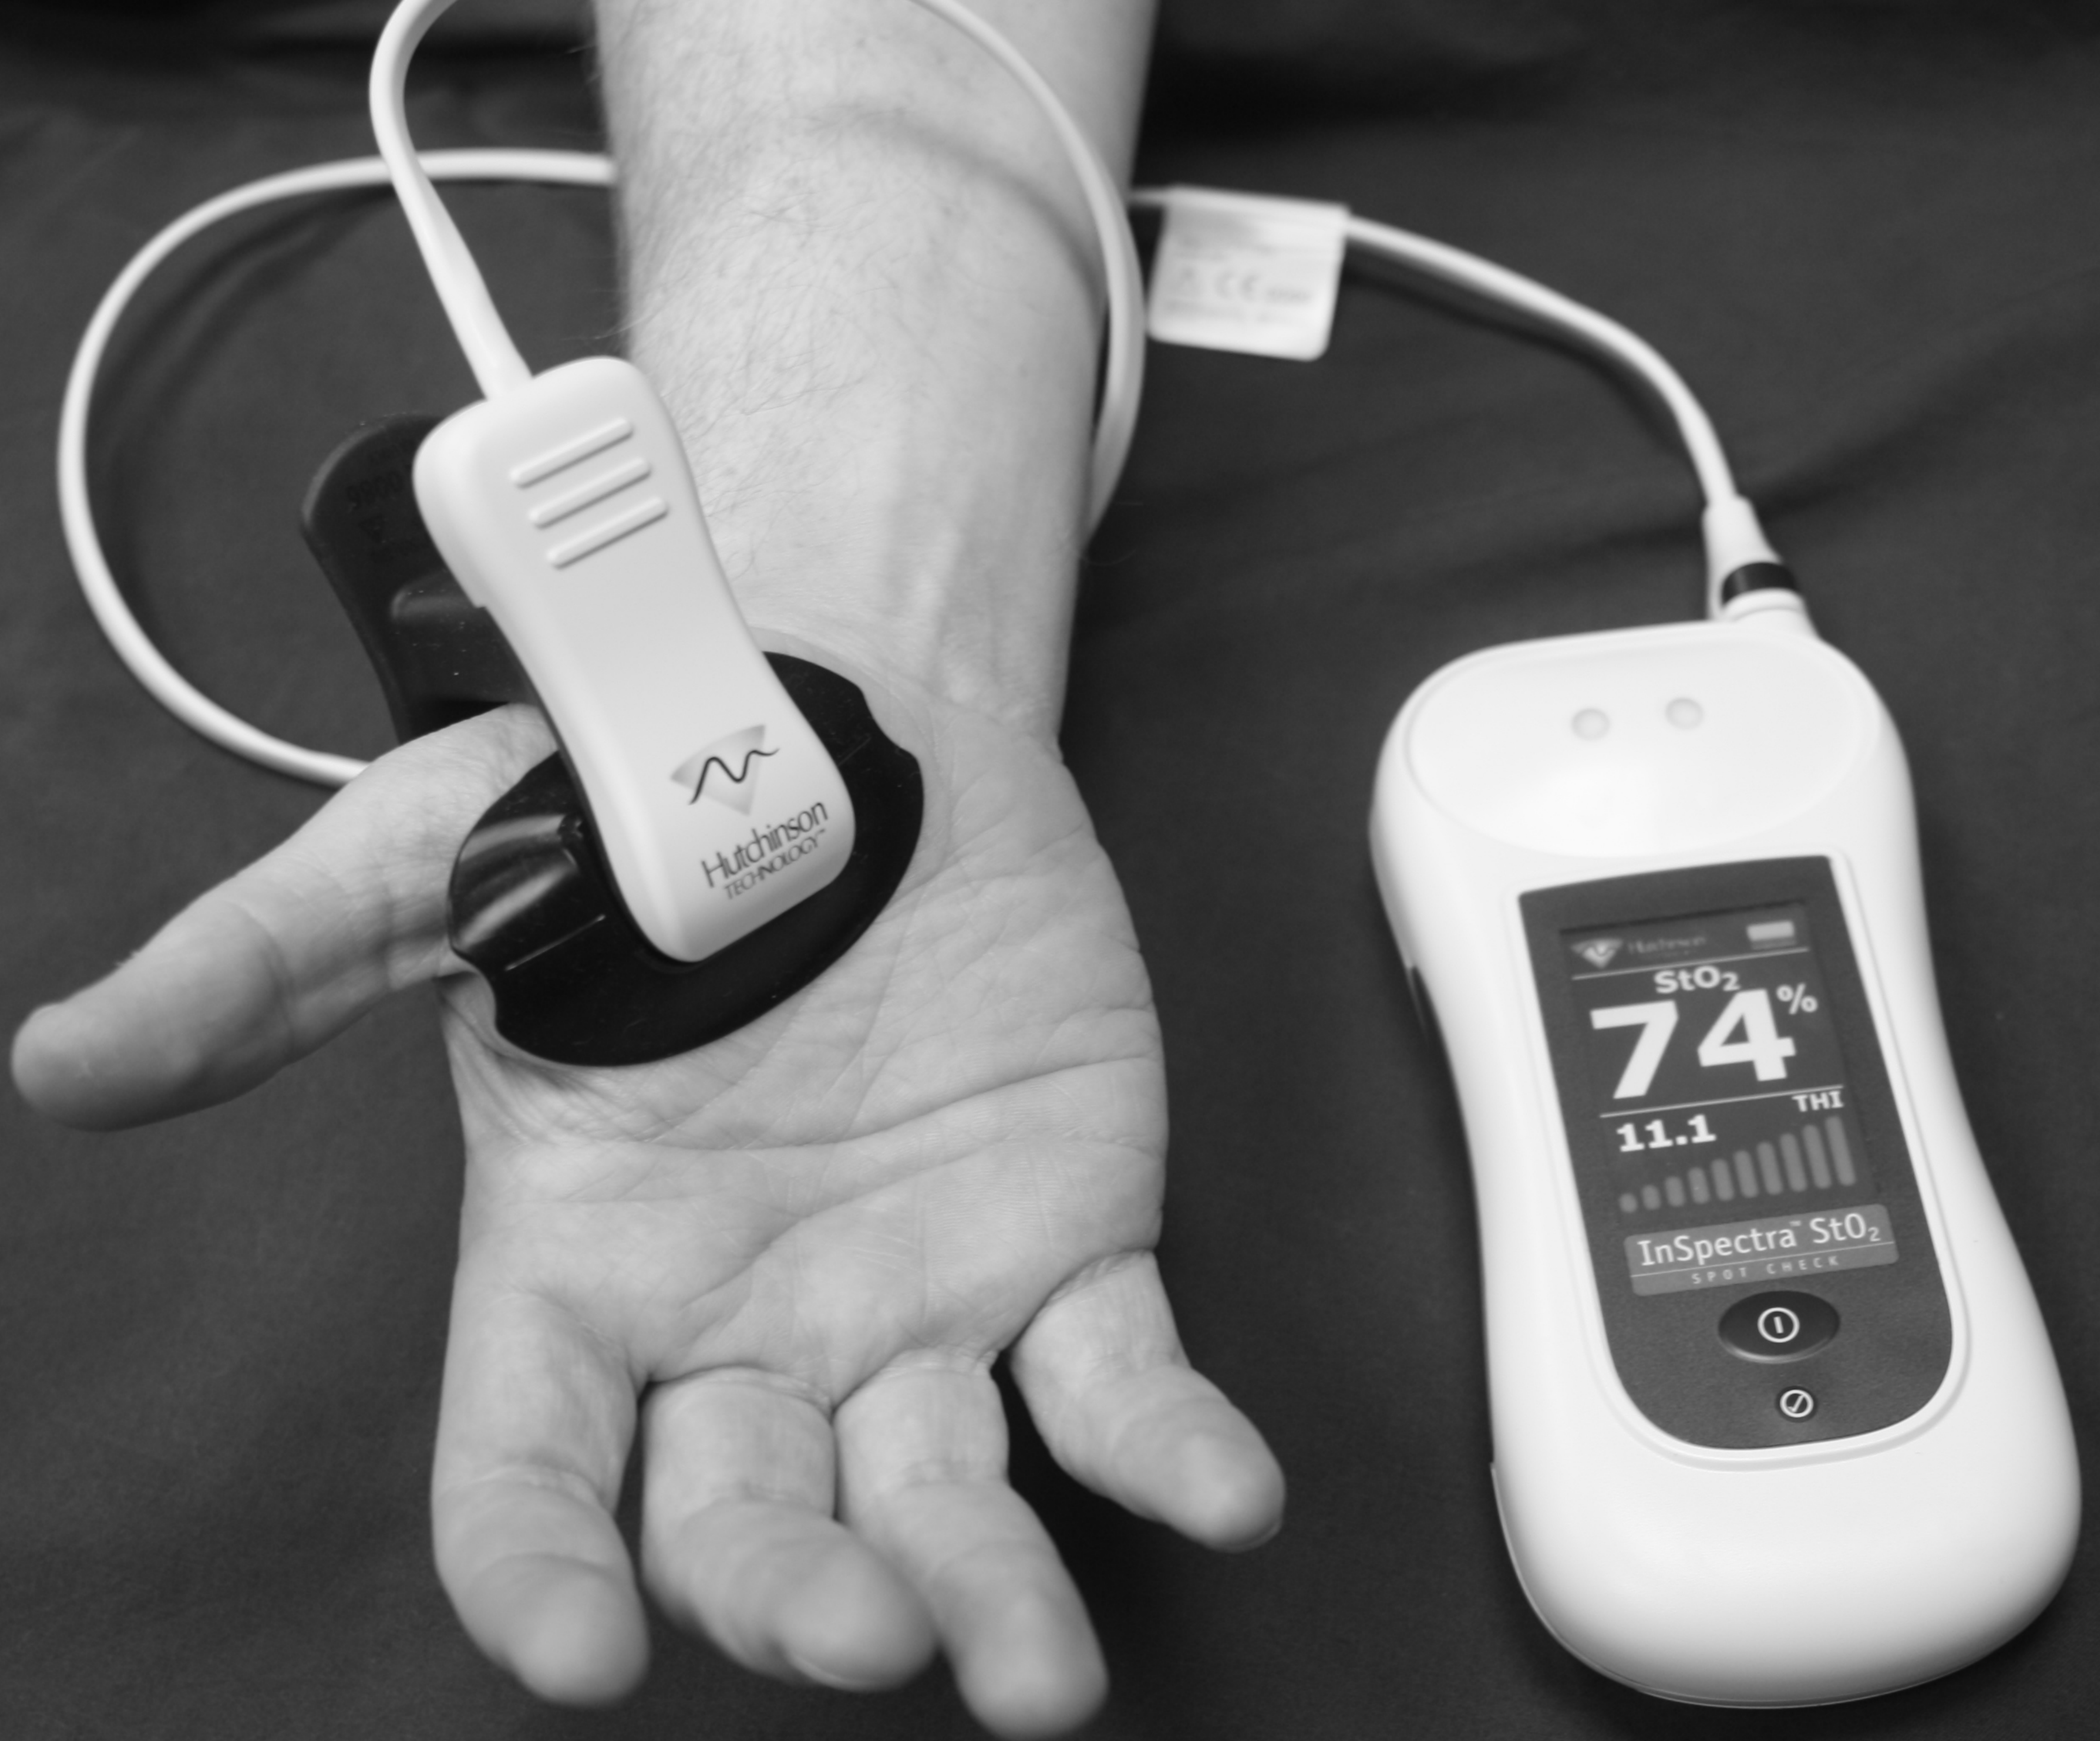

Hutchinson  
TECHNOLOGY

StO<sub>2</sub>  
**74%**

11.1 THI

InSpectra™ StO<sub>2</sub>  
SPOT CHECK

Supplement: MOESM1 [file 12196106]
